# Supplementary material for: PbMnTeO6: a chiral quasi 2D magnet with all cations in octahedral coordination and the space group problem of trigonal layered A2+M4+TeO6
Source: Royal Society of Chemistry journal article supplement (doi:10.1039/c9dt03154e), 2019-01-01
Supplement: c9dt03154e2.pdf [file c9dt03154e2.pdf]

Electronic Supplementary Information for the Paper

PbMnTeO<sub>6</sub>: a chiral quasi 2D magnet with all cations in octahedral coordination and the space group problem of trigonal layered A<sup>2+</sup>M<sup>4+</sup>TeO<sub>6</sub>

Mariia D. Kuchugura<sup>a,b</sup>, Alexander I. Kurbakov<sup>a,b</sup>, Elena A. Zvereva<sup>c</sup>, Tatyana M. Vasilchikova<sup>c</sup>, Grigory V. Raganyan<sup>c</sup>, Alexander N. Vasiliev<sup>c,d,e</sup>, Victor A. Barchuk<sup>f</sup> and Vladimir B. Nalbandyan<sup>f\*</sup>

<sup>a</sup>*NRC «Kurchatov Institute» - PNPI, 188300 Gatchina, Russia*

<sup>b</sup>*Faculty of Physics, St. Petersburg University, 199034, St. Petersburg, Russia*

<sup>c</sup>*Faculty of Physics, M.V. Lomonosov Moscow State University, Moscow 119991, Russia*

<sup>d</sup>*National Research South Ural State University, Chelyabinsk 454080, Russia*

<sup>e</sup>*National University of Science and Technology "MISiS", Moscow 119049, Russia.*

<sup>f</sup>*Faculty of Chemistry, Southern Federal University, 344090 Rostov-on-Don, Russia*

Contents

EDX analysis of PbMnTeO<sub>6</sub>

Neutron diffraction data

Preparation and properties of PbGeTeO<sub>6</sub>

### EDX analysis of PbMnTeO<sub>6</sub>

For elemental analysis of PbMnTeO<sub>6</sub>, an electron microprobe (INCA ENERGY 450/XT) was used with an X-Act ADD detector based on an electron microscope VEGA II LMU (Tescan) operated at the accelerating voltage of 20 kV. The data were averaged on five measurements at various points of the sample (Table S1) and yielded the following gross formula: Pb<sub>0.96(1)</sub>Mn<sub>0.97(7)</sub>Te<sub>1.00(3)</sub>O<sub>4.9(5)</sub>. Within experimental uncertainties, the cationic composition is stoichiometric and agrees with the previously reported Pb<sub>0.99(8)</sub>Mn<sub>1.04(7)</sub>Te<sub>0.98(1)</sub>O<sub>x</sub>.<sup>1</sup>

Table S1. Results of the EDX analysis of PbMnTeO<sub>6</sub>

| Element                                                    | Pb       | Mn        | Te        | O        |
|------------------------------------------------------------|----------|-----------|-----------|----------|
| Weight %                                                   | 43.61    | 11.28     | 27.71     | 17.4     |
|                                                            | 44.01    | 12.9      | 29.39     | 13.71    |
|                                                            | 43.56    | 11.39     | 27.54     | 17.52    |
|                                                            | 43.47    | 10.8      | 27.09     | 18.64    |
|                                                            | 43.2     | 11.61     | 27.56     | 17.63    |
| Average                                                    | 43.57    | 11.59     | 27.86     | 16.98    |
| Esd                                                        | 0.29     | 0.79      | 0.89      | 1.9      |
| Recalculated to atomic fractions<br>and normalized to 1 Te | 0.963(6) | 0.966(66) | 1.000(32) | 4.86(54) |

### Neutron diffraction data

Table S2. Details of the neutron diffraction experiment and structure refinement of PbMnTeO<sub>6</sub>, space group *P312*

|                           |                   |                                    |        |
|---------------------------|-------------------|------------------------------------|--------|
| Wavelength, Å             | 1.494             | <i>Z</i>                           | 1      |
| Step size, °              | 0.050             | Molar weight                       | 485.74 |
| Angular range, °          | 3.55-164.50       | Density (calc.), g/cm <sup>3</sup> | 6.634  |
| Number of <i>h k l</i>    | 124               | <i>R</i> <sub>p</sub> , %          | 4.17   |
| Temperature, K            | 300               | <i>R</i> <sub>wp</sub> , %         | 5.47   |
| Space group               | <i>P312</i> (149) | <i>R</i> <sub>e</sub> , %          | 4.38   |
| <i>a</i> , Å              | 5.10112(2)        | χ <sup>2</sup>                     | 1.455  |
| <i>c</i> , Å              | 5.39564(4)        |                                    |        |
| <i>V</i> , Å <sup>3</sup> | 121.59            |                                    |        |

Table S3. Atomic coordinates, thermal displacement parameters and site occupancy factors of  $\text{PbMnTeO}_6$ , space group  $P312$

| Atom | x/a       | y/b       | z/c         | $U_{\text{iso}}$ | SOF      |
|------|-----------|-----------|-------------|------------------|----------|
| Pb   | 0         | 0         | 0           | 0.0110(4)        | 1        |
| Mn1  | 2/3       | 1/3       | 1/2         | 0.0090(19)       | 0.906(6) |
| Te1  | 1/3       | 2/3       | 1/2         | 0.0082(11)       | 0.906(6) |
| Mn2  | 1/3       | 2/3       | 1/2         | 0.0082(11)       | 0.094(6) |
| Te2  | 2/3       | 1/3       | 1/2         | 0.0090(19)       | 0.094(6) |
| O    | 0.3815(2) | 0.0019(4) | 0.30184(17) | 0.0085(2)        | 1        |

### Preparation and properties of $\text{PbGeTeO}_6$

$\text{PbGeTeO}_6$  was prepared similar to  $\text{PbMnTeO}_6$ , by solid-state reactions from reagent-grade  $\text{PbO}_2$ ,  $\text{GeO}_2$  and  $\text{TeO}_2$  in three steps: at 500 °C (1h), 730 °C (15 h) and 700 °C (5 h) with intermediate regrinding and pressing. Phase purity of the product is illustrated by its XRD pattern (Fig. S1). Lattice parameters were refined with corundum as internal standard:  $a=5.0885(2)$ ;  $c=5.4484(1)$  Å. Another single-phase sample was prepared by a slightly different route with essentially same lattice constants:  $a=5.0885(2)$ ;  $c=5.4487(1)$  Å.

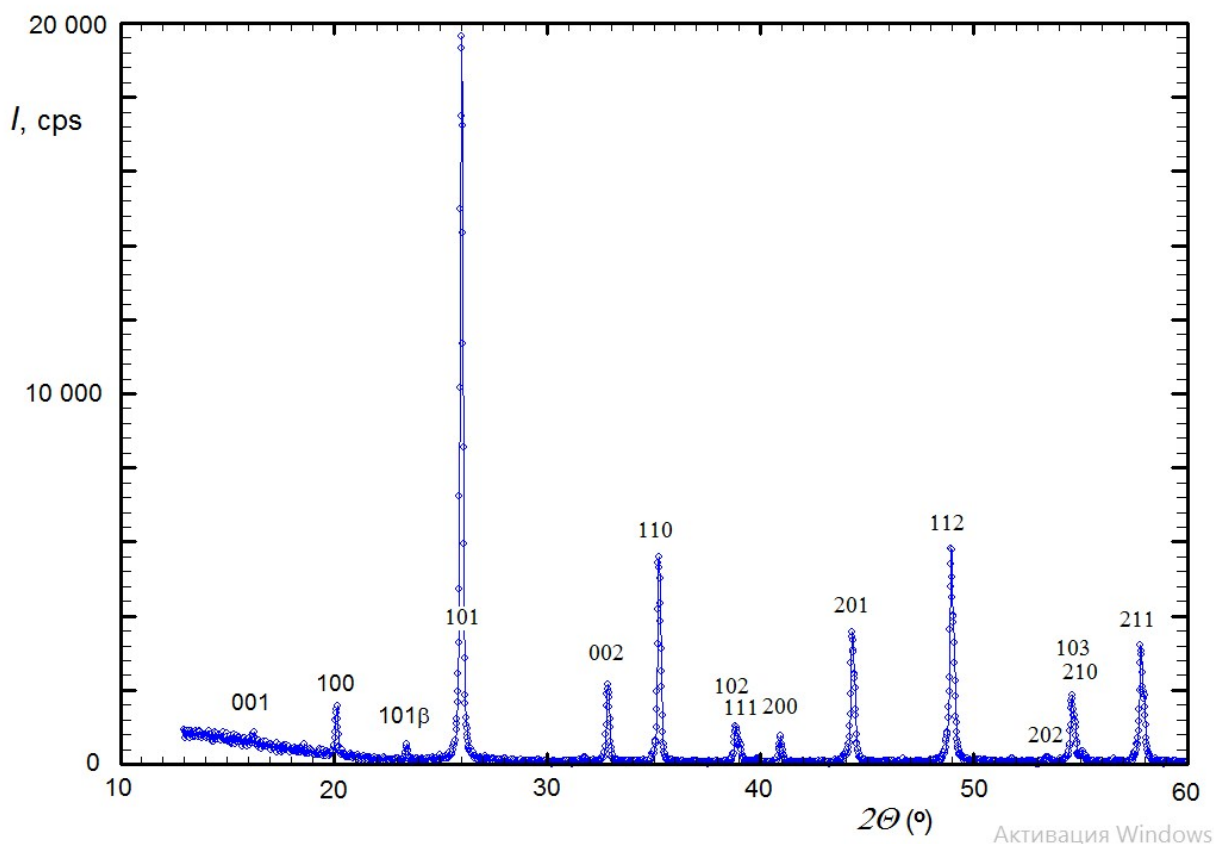

Fig. S1. XRD pattern of  $\text{PbGeTeO}_6$  (low angle part)

Dense  $\text{PbGeTeO}_6$  ceramics was prepared by uniaxial hot pressing for 1 h at 700 °C in surrounding coarse-grained corundum. Then, the outer contaminated layer was eliminated using a diamond saw and two discs were cut, with diameter of 12.5 mm and thickness of 1.2 mm. Their apparent density, 6.52 g/cm<sup>3</sup>, constitutes 95% of the X-ray density (6.84 g/cm<sup>3</sup>).

XRD of the disc surface revealed considerable grain orientation indicated by enhanced intensity ratio of reflections 0 0 2 and 1 1 0, as compared with the powder mixed with coffee eliminating grain orientation (Fig. S2). This means preferred orientation of the three-fold axis, suggested to be polar, perpendicular to the disc, thus making favourable conditions for discovery of dielectric anomalies, if any.

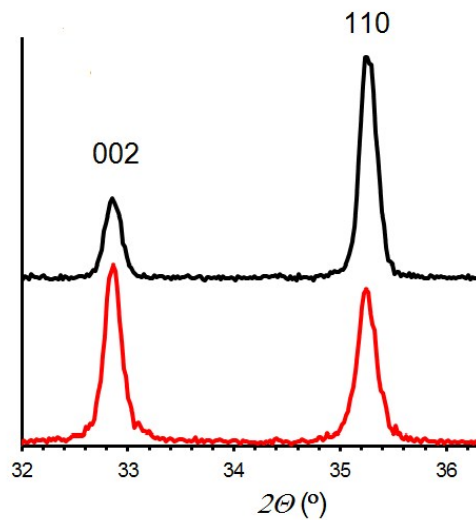

Fig. S2. Comparison of reflections from planes parallel (002) and perpendicular (110) to the layers of the  $\text{PbGeTeO}_6$  crystal structure. Top (black): powder mixed with coffee; bottom (red): ceramic disc

The discs were electroded by firing silver paste. One of them was used for study of temperature dependence of dielectric properties: permittivity and loss tangent (Fig. S3). The measurements were made with a semi-automatic bridge Tesla BM-484 at a fixed frequency of 1592 Hz. No signs of expected ferroelectric phase transition could be found between room temperature and 300 °C, and at higher temperatures, rapid growth of conductivity and losses precluded meaningful measurements. In addition, absolute values of relative permittivity, in the range 20-50, were too low for ferroelectric ceramics. Another disc was tested for ferroelectric hysteresis using a standard Sawyer-Tower circuit at room temperature. Here, again, meaningful results could not be obtained: instead of characteristic hysteresis loop, only oval loops could be observed typical of conducting samples.

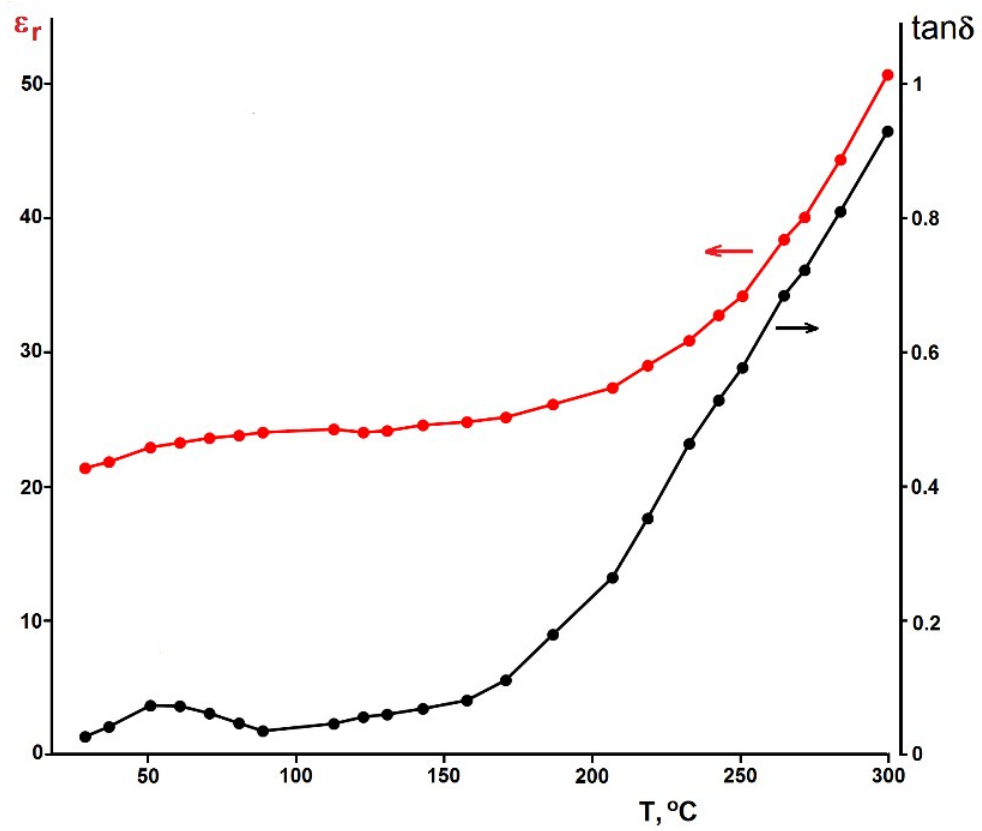

Fig. S3. Temperature dependence of the relative dielectric permittivity (red) and loss tangent (black) of dense  $\text{PbGeTeO}_6$  ceramics at 1592 Hz.
